# Supplementary material for: Structure and properties of nano-confined poly(3-hexylthiophene) in nano-array/polymer hybrid ordered-bulk heterojunction solar cells
Source: Royal Society of Chemistry journal article supplement (doi:10.1039/c1nr10858a), 2011-11-17
Supplement: c1nr10858a.pdf [file c1nr10858a.pdf]

## Supporting Information for Nanoscale

# Structure and properties of nano-confined poly(3-hexylthiophene) in nano-array/polymer hybrid ordered-bulk heterojunction solar cells

*Thelese R.B. FOONG, Khai Leok CHAN and Xiao HU\**

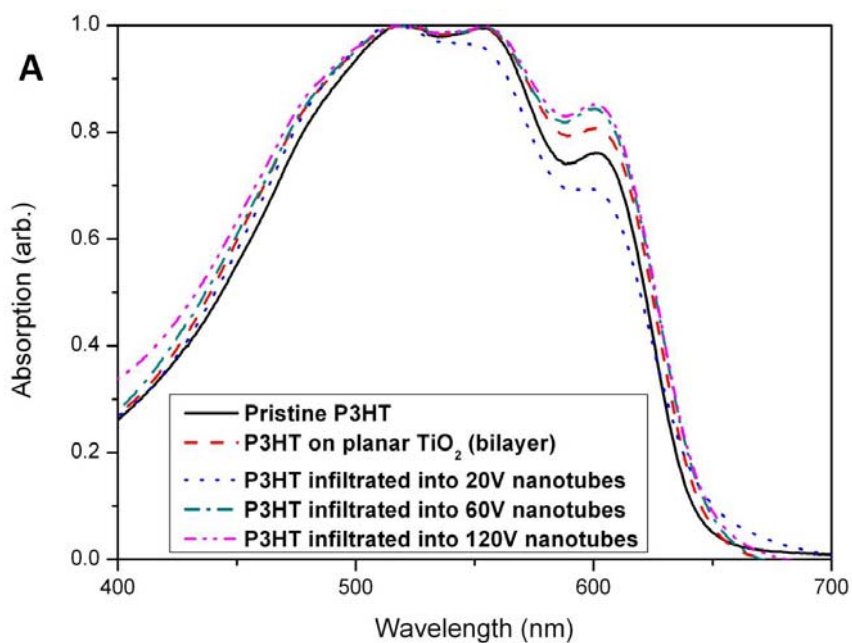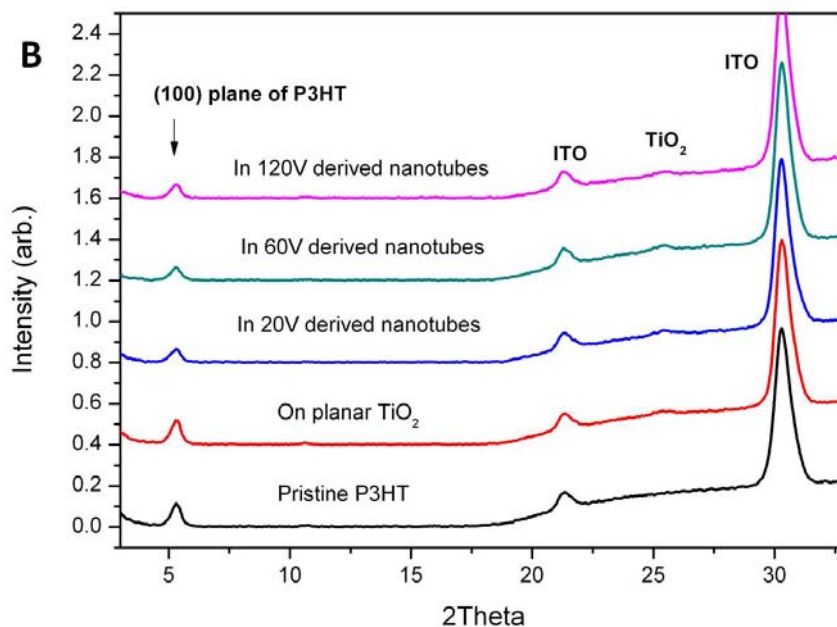

**Supporting Figure S1.** a) UV-vis absorption and b) XRD spectrum obtained from low regio-regularity P3HT (regioregularity ~ 90–93%, molecular weight ~ 50–60K). The trends observed in the spectrum are similar to those for high-regioregularity P3HT described in the main text.
